# Supplementary material for: Accurate determination of selenium in blood serum by isotope dilution analysis using inductively coupled plasma collision cell mass spectrometry with xenon as collision gas
Source: Royal Society of Chemistry journal article supplement (doi:10.1039/b611324a), 2006-11-24
Supplement: b611324a.pdf [file b611324a.pdf]

## ELECTRONIC SUPPLEMENTARY INFORMATION

### Instrumental parameters of the ICP MS

| ICP MS (Agilent 7500ce) | Xenon collision cell                   | Hydrogen reaction cell                    |
|-------------------------|----------------------------------------|-------------------------------------------|
| rf power                | 1550 W                                 | 1500 W                                    |
| Sampling depth          | 9 mm                                   | 7.5 mm                                    |
| Cones                   | Nickel                                 | Nickel                                    |
| Nebulizer gas flow      | 0.9 L min <sup>-1</sup>                | 0.8 L min <sup>-1</sup>                   |
| Makeup gas flow         | 0.35 L min <sup>-1</sup>               | 0.25 L min <sup>-1</sup>                  |
| Cell gas flow           | 130 - 160 $\mu$ L min <sup>-1</sup> Xe | 3 - 5 mL min <sup>-1</sup> H <sub>2</sub> |
| Extraction lens 1       | 8.0 V                                  | 4 V                                       |
| Extraction lens 2       | -130 V                                 | -140 V                                    |
| Cell entrance           | - 28 V                                 | - 50 V                                    |
| Octopole bias           | - 45 V                                 | - 18 V                                    |
| Quadrupole bias         | - 1.4 V                                | - 17 V                                    |

### Elimination of polyatomic interferences with xenon as collision gas

**Ar<sub>2</sub><sup>+</sup> interferences.** The collision energy resulting from the collision of argon dimers with xenon atoms can be calculated using eqn. (1):

$$E_{cm} = \frac{m_c}{m_c + m_i} E_{lab} \quad (1)$$

$E_{cm}$  corresponds to the collision energy in the centre of mass,  $m_c$  to the mass of the collision gas and  $m_i$  to the mass of the polyatomic ion.  $E_{lab}$  is the kinetic energy achieved by the potential difference between the extraction lens and the collision/reaction cell. Under the instrumental conditions used in this study the collision energy was calculated to be 22.4 eV which was distinctly higher than the dissociation energy of the Ar<sub>2</sub><sup>+</sup> ion (1.24 – 1.33 eV).<sup>1</sup> Thus a collision induced dissociation of the argon dimers with xenon should be possible under these conditions. The elimination of the Ar<sub>2</sub><sup>+</sup> interferences was achieved by a xenon flow rate above 130  $\mu$ L min<sup>-1</sup> which was confirmed by an accurate <sup>78</sup>Se/<sup>80</sup>Se isotope ratio measurement (Figure) without mathematical interference corrections.

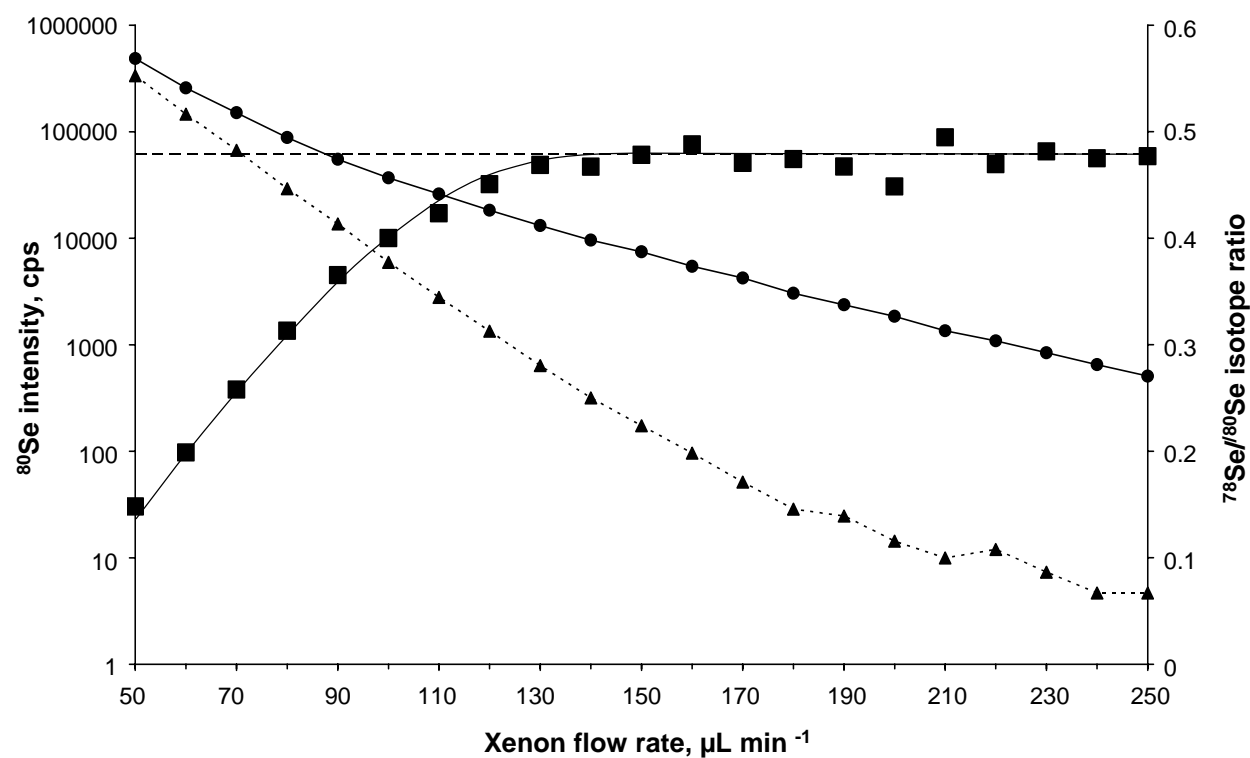

Selenium intensity and isotope ratios as function of the xenon gas flow rate in the collision cell. (●)  $^{80}\text{Se}$  intensity for a  $100 \mu\text{g L}^{-1}$  selenium solution; (▲)  $^{80}\text{Se}$  intensity for a blank solution (1.5 % (v/v)  $\text{HNO}_3$ ). (■) Experimental  $^{78}\text{Se}/^{80}\text{Se}$  isotope ratios after mass bias correction; dashed horizontal line: theoretical  $^{78}\text{Se}/^{80}\text{Se}$  isotope ratio (0.47934).

(1) W. R. Wadt, *J. Chem. Phys.*, 1978, **68**, 412.
